# Supplementary material
Source: Springer Nature journal article supplement (https://www.springermedizin.de/resource/supplementary/12888_2010_732_MOESM3_ESM.PDF/9477974)
Supplement: MOESM3 [file 9477974]

## Appendix 3

Table 2: Barriers to Recruitment with regards to Bipolar Disorder.

| Paper (authors)                                                                                                                                       | Country of Origin/ Study population                                                                                                                                                                                                                                                                                                  | Methods/ study design                                                                                                                                                                                                                                      | Anticipated barriers | Barriers reported on recruitment                                                                                                                                                                                                                                                                    | Strategies to over come these barriers/results [Proposed, Tested and, Used Strategies]]                                                                                                                                                                                                                                                                                                                                                     | Methodological limitations. | Primary factor discussed/                                       |
|-------------------------------------------------------------------------------------------------------------------------------------------------------|--------------------------------------------------------------------------------------------------------------------------------------------------------------------------------------------------------------------------------------------------------------------------------------------------------------------------------------|------------------------------------------------------------------------------------------------------------------------------------------------------------------------------------------------------------------------------------------------------------|----------------------|-----------------------------------------------------------------------------------------------------------------------------------------------------------------------------------------------------------------------------------------------------------------------------------------------------|---------------------------------------------------------------------------------------------------------------------------------------------------------------------------------------------------------------------------------------------------------------------------------------------------------------------------------------------------------------------------------------------------------------------------------------------|-----------------------------|-----------------------------------------------------------------|
| Research with severally mentally ill Latinas: Successful recruitment and retention strategies (Loue and Sajatovic, 2008)See Schizophrenia Table. [26] |                                                                                                                                                                                                                                                                                                                                      |                                                                                                                                                                                                                                                            |                      |                                                                                                                                                                                                                                                                                                     |                                                                                                                                                                                                                                                                                                                                                                                                                                             |                             |                                                                 |
| Effect of different recruitment sources on composition of a bi polar case registry. (Scholle <i>et al.</i> 2000) [47]                                 | USA<br>Members of a National voluntary bipolar case registry (April 1995- October 1997) sponsored by a university psychiatry department in Pittsburgh USA. 88% of registrants were in psychiatric treatment. Locally recruited participants were 92% Caucasian, 61% Female. National registrants were 63 % female, & 94 % Caucasian. | Quantitative analysis of demographics of registry patients.<br>Recruitment methods: Health professionals; patient support groups; general public relations and other i.e. (word of mouth).<br>Mean ages are listed in the paper across recruitment source. | Recruitment source.  | Local Registrants:<br>Not significant however patients recruited through patient support groups tended to be older, better educated, more likely to be married, and Caucasian.<br>National Registrants:<br>Those recruited through the internet were more likely to be younger and better educated. | Local registrants (n = 684) were primarily recruited through health professionals (44%), and a general public relations effort by the centre staff (22%). Recruitment by public relations efforts was the most expensive method of recruitment.<br><br>National registrants (n = 823) were mostly recruited through the internet (32%) and patient support groups (31%).<br><br>No sig gender differences were cited by recruitment source. |                             | Barriers to registering on the voluntary bipolar case registry. |
